# Supplementary material for: Gestational exposure to an epidemiologically defined mixture of phthalates leads to gonadal dysfunction in mouse offspring of both sexes
Source: PubMed Central journal article supplement (PMC6478857; doi:10.1038/s41598-019-42377-6), 2019-04-23
Supplement: 41598_2019_42377_MOESM1_ESM.pdf [file 41598_2019_42377_MOESM1_ESM.pdf]

Title: **Gestational exposure to an epidemiologically defined mixture of phthalates leads to gonadal dysfunction in mouse offspring of both sexes**

Anastasia Repouskou, Emily Panagiotidou, Lydia Panagopoulou, Pernilla Larsson Bisting, Astrud R. Tuck, Marcus O.D. Sjödin, Johan Lindberg, Evangelos Bozas, Joëlle Rüegg, Chris Gennings, Carl-Gustaf Bornehag, Pauliina Damdimopoulou, Antonios Stamatakis, Efthymia Kitraki.

**SUPPLEMENTAL TABLES & FIGURES**

**Table S1.** Body weights of male and female offspring on PND1, PDN21 and PND90

| Body weight<br>(grams) | Males              |                   |                                |                                |
|------------------------|--------------------|-------------------|--------------------------------|--------------------------------|
|                        | DMSO               | 10x               | 100x                           | 500x                           |
| PND1                   | 1.57±0.02<br>(34)  | 1.64±0.03<br>(14) | 1.51±0.02<br>(19)              | 1.50±0.02<br>(26)              |
| PND21                  | 7.76±0.10<br>(30)  | 8.01±0.15<br>(13) | 7.49±0.11<br>(19)              | 7.48±0.09<br>(26)              |
| PND90                  | 23.53±0.20<br>(21) | 24.17±0.32<br>(8) | 23.28±0.27<br>(12)             | 24.21±0.24<br>(13)             |
|                        | Females            |                   |                                |                                |
| PND1                   | 1.52±0.03<br>(26)  | 1.59±0.04<br>(15) | 1.47±0.03<br>(14)              | 1.42±0.03<br>(16)              |
| PND21                  | 8.14±0.09<br>(24)  | 8.21±0.11<br>(17) | 7.31±0.11 <sup>#</sup><br>(14) | 7.23±0.11 <sup>#</sup><br>(12) |
| PND90                  | 18.52±0.22<br>(14) | 18.01±0.27<br>(9) | 17.82±0.25<br>(9)              | 18.8±0.25<br>(9)               |

Values represent estimated marginal means ± SE. The number of animals is given in parentheses.  
# p < 0.001 vs. DMSO.

**Table S2.** Number of litters used, litter size and % of male offspring per group.

|                                          | DMSO        | 10x         | 100x       | 500x     |
|------------------------------------------|-------------|-------------|------------|----------|
| Number of litters                        | 9           | 6           | 5          | 6        |
| Litter size<br>(mean ± SEM)              | 6.78 ± 0.66 | 5.33 ± 0.92 | 6.6 ± 0.51 | 7 ± 0.45 |
| Male offspring<br>(% of total offspring) | 55.7        | 43.8        | 57.6       | 61.9     |

**Table S3.** qRT-PCR primers used in the study

| <b>Gene</b>    | <b>Forward primer (5'-3')</b> | <b>Reverse primer (5'-3')</b> | <b>PrimerBank ID / citation</b>   |
|----------------|-------------------------------|-------------------------------|-----------------------------------|
| <i>β-actin</i> | GGCTGTATTCCCCTCCATCG          | CCAGTTGGTAACAATGCCATGT        | 6671509a1                         |
| <i>Star</i>    | GTCATCAGAGCTGAACACGG          | GGTGGTTGGCGAACTCTATC          | designed using NCBI software      |
| <i>Cyp17a1</i> | CTCCAGCCTGACAGACATTCTG        | TCTCCCACCGTGACAAGGAT          | 6681099a1                         |
| <i>Cyp19a1</i> | ATGTTCTTGAAATGCTGAACCC        | AGGACCTGGTATTGAAGACGAG        | Ref.1                             |
| <i>Fshr</i>    | TGCTCTAACAGGGTCTTCCTC         | TCTCAGTTCAATGGCGTTCCG         | 242397445c1                       |
| <i>Lhcgr</i>   | CGCCCGACTATCTCTCACCTA         | GACAGATTGAGGAGTTGTCAAA        | 7305233a1                         |
| <i>Sox9</i>    | AGTACCCGCATCTGCACAAC          | ACGAAGGGTCTCTTCTCGCT          | 165932320c1                       |
| <i>Dmrt1</i>   | CAGAGGGACGCATGGTCATC          | TGTAGTAGGCGGGTCTGATA          | 158631231c1                       |
| <i>Foxl2</i>   | AACACCGGAGAAACCAGACC          | CGTAGAACGGGAACTTGGCT          | designed using NCBI software      |
| <i>HPRT1</i>   | GCCCTGGCGTCGTGATTAGT          | TGTCCTGACTTGAGAACGAGC         | designed using NCBI software      |
| <i>HSD3B2</i>  | ATCTAAGTTACGCCCTCTTC          | CTTCTCTTCTTGACTTCCT           | KiCq Start Primers, Sigma-Aldrich |
| <i>STAR</i>    | GACAAAGTGATGAGTAAAGTGG        | GTAAGTAATGAGTGCTCGAC          | KiCq Start Primers, Sigma-Aldrich |
| <i>CYP17A1</i> | GAAGTTATCATCAATCTGTGGG        | GTCATTCGATAAACGGGAAG          | KiCq Start Primers, Sigma-Aldrich |
| <i>CYP19A1</i> | ATGTGGACGTGTTGACCCTTCT        | AACTACGTACCGTTCGAGAGGA        | KiCq Start Primers, Sigma-Aldrich |

## References

1. Bouma, G.J., Hart, G.T., Washburn, L.L., Recknagel, A.K. & Eicher, E.M. Using real time RT-PCR analysis to determine multiple gene expression patterns during XX and XY mouse fetal gonad development. *Gene Expr. Patterns* **5**, 141-9 (2004).

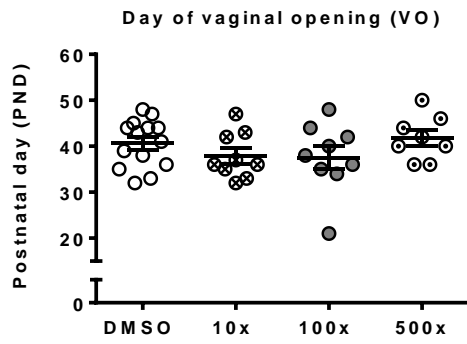

**Figure S1.** Day of vaginal opening (VO) for female offspring exposed *in utero* to DMSO (n=14) or to 10x (n=9), 100x (n=9) and 500x (n=8) the geometric mean of SELMA mothers' levels for the chemicals in Mixture S. Circles represent individual values, also means  $\pm$  SEM are given. No significant differences were detected vs. DMSO.

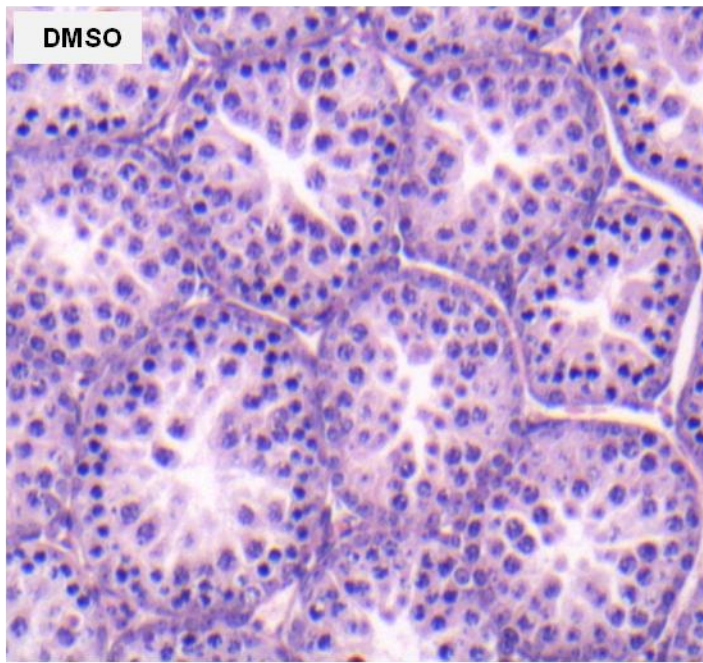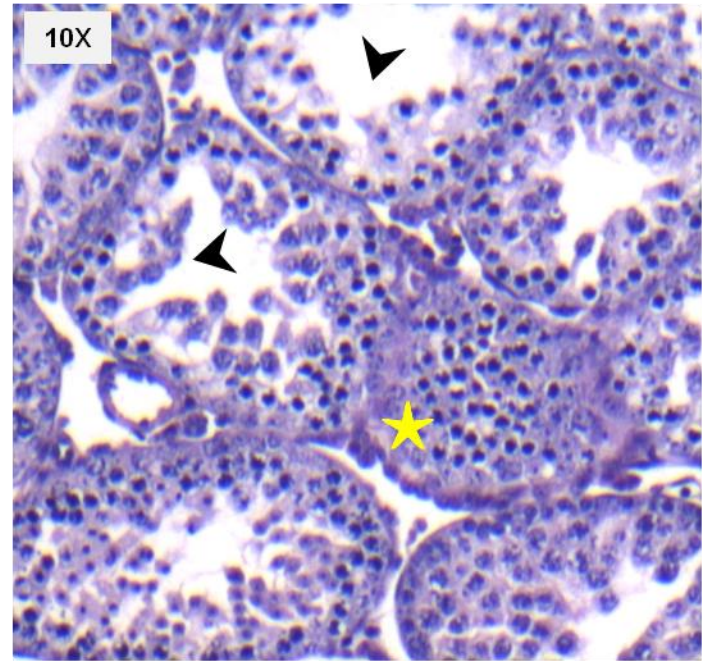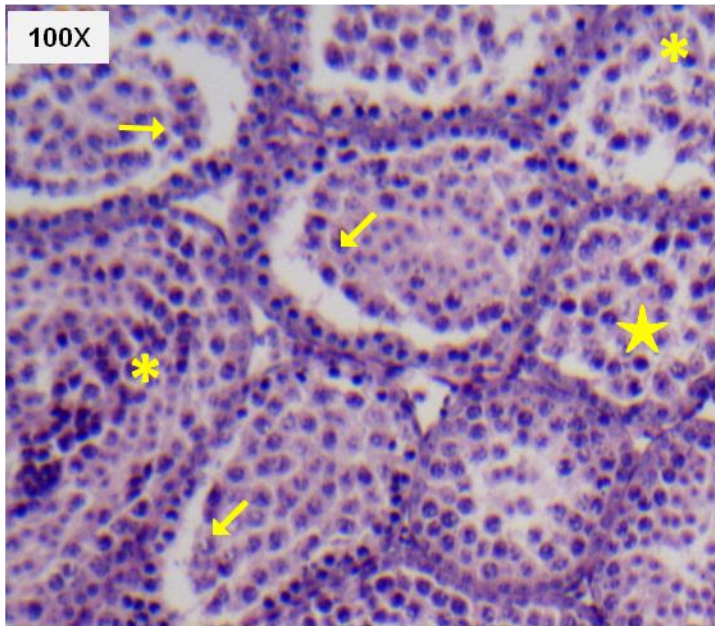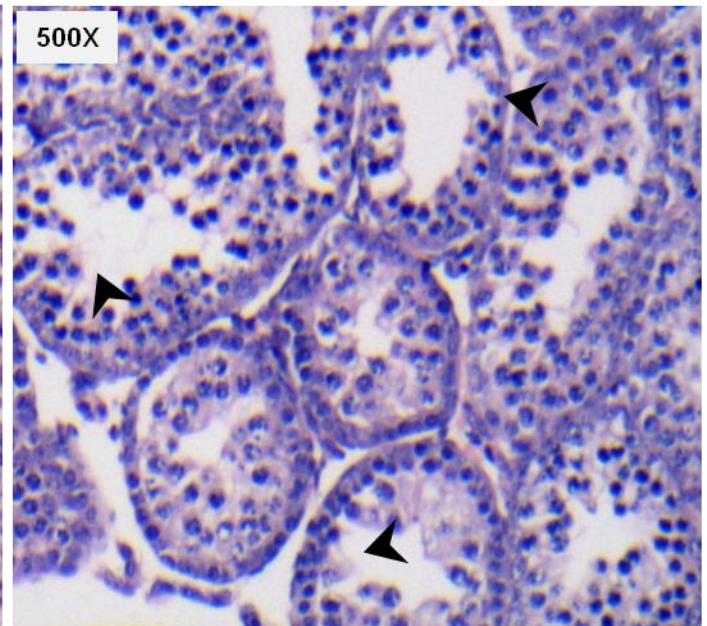

**Figure S2A.** Supplementary photomicrographs of testicular histology of PND21 offspring exposed to 0x (DMSO), 10x, 100x and 500x SELMA mothers' levels. ★ indicate tubules without lumen; \* Indicate tubules with germ cells in the lumen; arrows indicate detached layers; arrowheads indicate tubules with abnormal layers.



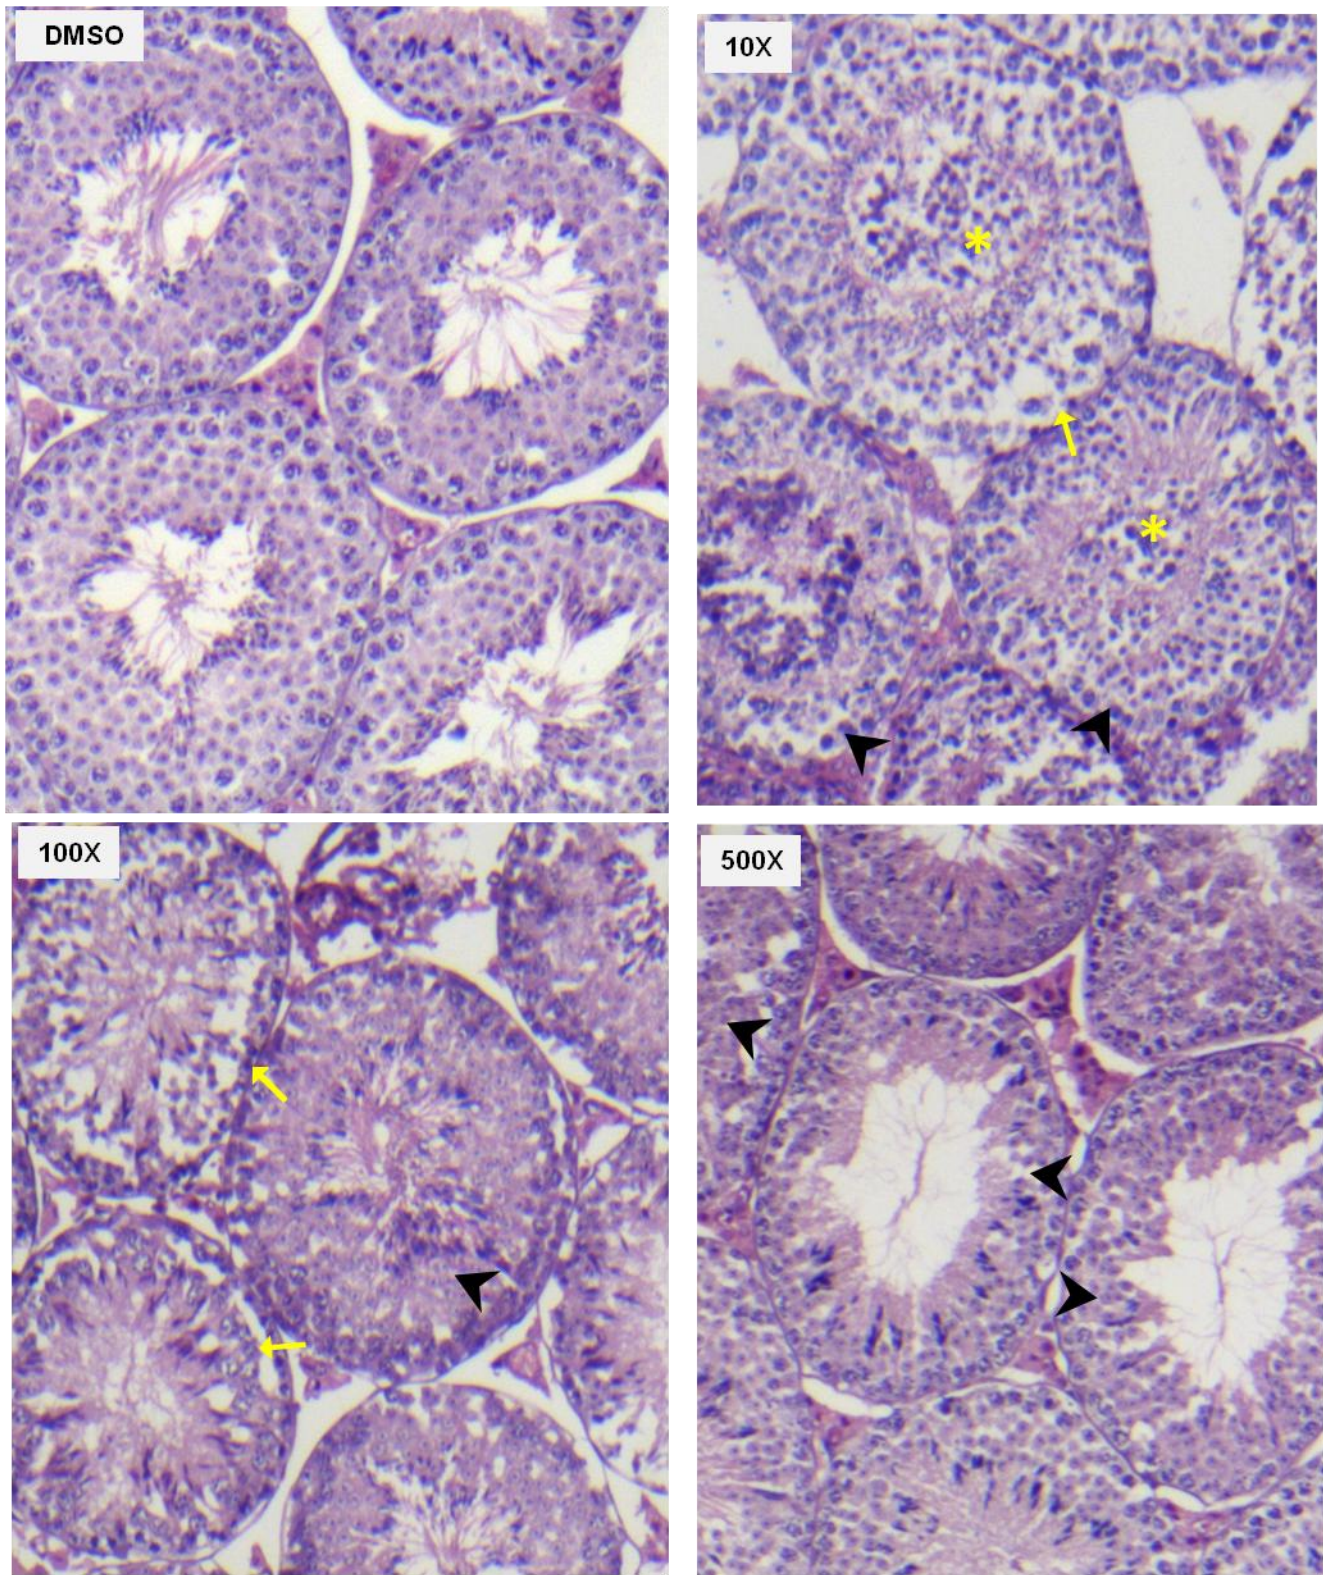

**Figure S2B.** Supplementary photomicrographs of testicular histology of PND90 offspring exposed to 0x (DMSO), 10x, 100x and 500x SELMA mothers' levels. \* Indicate tubules with germ cells in the lumen; arrows indicate detached layers; arrowheads indicate tubules with abnormal layers.

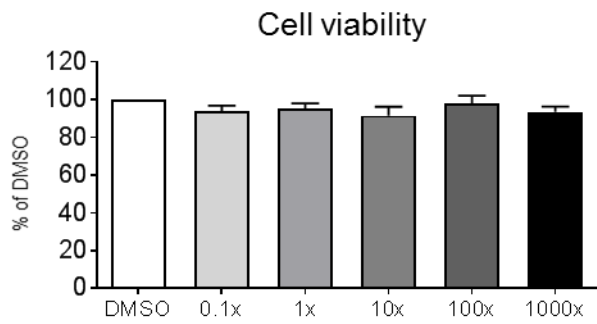

**Figure S3.** Cytotoxicity assessment of Mixture S on H295R cells after 48 h of Mixture exposure. N = 3 experiments with 3 technical replicates; data represent mean  $\pm$  SEM.

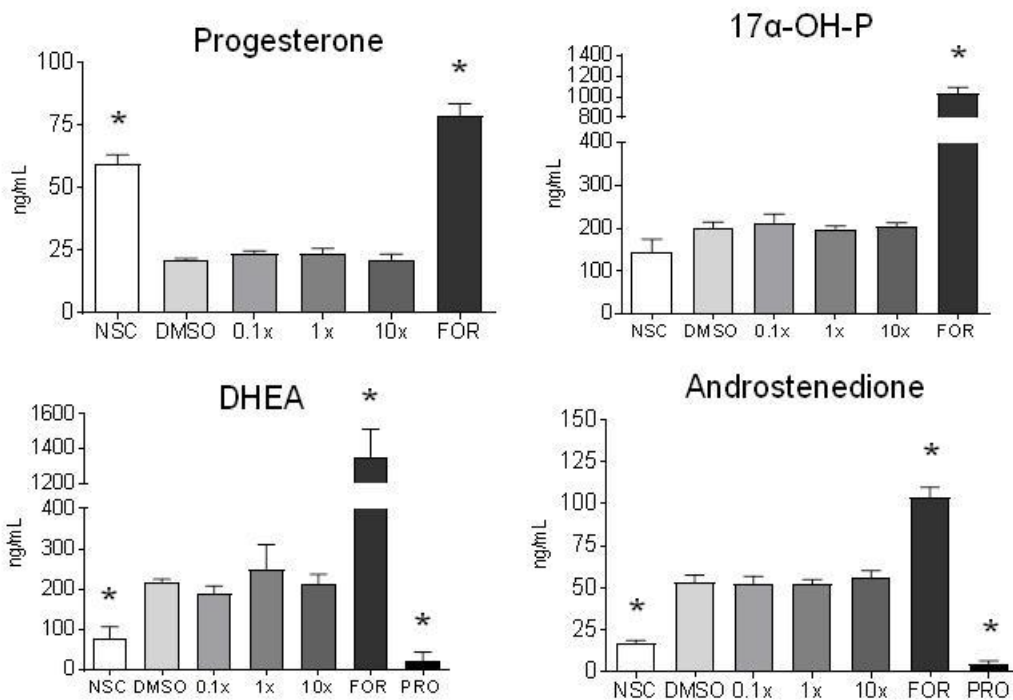

**Figure S4.** Production of steroid hormones by H295R cells after 24 h Mixture S exposure. NSC – non-stimulated, non-treated control; FOR – forskolin; PRO – Prochloraz. N = 3 experiments with 2 technical replicates; data represent mean  $\pm$  SEM; \*  $p < 0.05$  vs. DMSO control; One-Way ANOVA with Dunnett's multiple comparison test.
